# Supplementary material
Source: HighWire-hosted journal article supplement (https://www.cmajopen.ca/highwire/filestream/80846/field_highwire_adjunct_files/3/open-2014-0044-2-at.pdf)
Supplement: open-2014-0044-2-at.pdf [file open-2014-0044-2-at.pdf]

## Appendix 2 (as supplied by the authors): Study design features of non-observational studies

|                                                                                                                                                                                                                                                                                                                                                                                                                                                                                                                                                                                                                                                                                                                                                                                                                                                                                                                                                                                                                                                                                                                                                                                                                                                                                                                                                                                                                                                                                                                                                                                                                                                                |                                   |                                                                                                                                                                                                                    |
|----------------------------------------------------------------------------------------------------------------------------------------------------------------------------------------------------------------------------------------------------------------------------------------------------------------------------------------------------------------------------------------------------------------------------------------------------------------------------------------------------------------------------------------------------------------------------------------------------------------------------------------------------------------------------------------------------------------------------------------------------------------------------------------------------------------------------------------------------------------------------------------------------------------------------------------------------------------------------------------------------------------------------------------------------------------------------------------------------------------------------------------------------------------------------------------------------------------------------------------------------------------------------------------------------------------------------------------------------------------------------------------------------------------------------------------------------------------------------------------------------------------------------------------------------------------------------------------------------------------------------------------------------------------|-----------------------------------|--------------------------------------------------------------------------------------------------------------------------------------------------------------------------------------------------------------------|
| <b>Article</b>                                                                                                                                                                                                                                                                                                                                                                                                                                                                                                                                                                                                                                                                                                                                                                                                                                                                                                                                                                                                                                                                                                                                                                                                                                                                                                                                                                                                                                                                                                                                                                                                                                                 | Fraser LK et al 2013 <sup>1</sup> |                                                                                                                                                                                                                    |
| <b>Allocation</b>                                                                                                                                                                                                                                                                                                                                                                                                                                                                                                                                                                                                                                                                                                                                                                                                                                                                                                                                                                                                                                                                                                                                                                                                                                                                                                                                                                                                                                                                                                                                                                                                                                              | Individual level                  |                                                                                                                                                                                                                    |
| <b>Study design</b>                                                                                                                                                                                                                                                                                                                                                                                                                                                                                                                                                                                                                                                                                                                                                                                                                                                                                                                                                                                                                                                                                                                                                                                                                                                                                                                                                                                                                                                                                                                                                                                                                                            | RCS                               |                                                                                                                                                                                                                    |
| <b>Study design features</b>                                                                                                                                                                                                                                                                                                                                                                                                                                                                                                                                                                                                                                                                                                                                                                                                                                                                                                                                                                                                                                                                                                                                                                                                                                                                                                                                                                                                                                                                                                                                                                                                                                   | <b>Support for judgment</b>       |                                                                                                                                                                                                                    |
| <i>Was there a comparison:</i>                                                                                                                                                                                                                                                                                                                                                                                                                                                                                                                                                                                                                                                                                                                                                                                                                                                                                                                                                                                                                                                                                                                                                                                                                                                                                                                                                                                                                                                                                                                                                                                                                                 |                                   |                                                                                                                                                                                                                    |
| Between two or more groups of clusters receiving different interventions?                                                                                                                                                                                                                                                                                                                                                                                                                                                                                                                                                                                                                                                                                                                                                                                                                                                                                                                                                                                                                                                                                                                                                                                                                                                                                                                                                                                                                                                                                                                                                                                      | Y                                 | Children referred to a hospice service compared to those not referred within a health authority involving all hospitals in the area. Regression model also allowed for comparison within groups overtime           |
| Within the same group of clusters over time?                                                                                                                                                                                                                                                                                                                                                                                                                                                                                                                                                                                                                                                                                                                                                                                                                                                                                                                                                                                                                                                                                                                                                                                                                                                                                                                                                                                                                                                                                                                                                                                                                   | Y                                 |                                                                                                                                                                                                                    |
| <i>Were participant/clusters allocated to groups by:</i>                                                                                                                                                                                                                                                                                                                                                                                                                                                                                                                                                                                                                                                                                                                                                                                                                                                                                                                                                                                                                                                                                                                                                                                                                                                                                                                                                                                                                                                                                                                                                                                                       |                                   |                                                                                                                                                                                                                    |
| Concealed randomization?                                                                                                                                                                                                                                                                                                                                                                                                                                                                                                                                                                                                                                                                                                                                                                                                                                                                                                                                                                                                                                                                                                                                                                                                                                                                                                                                                                                                                                                                                                                                                                                                                                       | N                                 | Record of program acceptance from the Pediatric Hospice. It's unknown why in the same period only 1/3 of the cohort was referred to the hospice program (family preferences, stigma, distance to the hospice, etc) |
| Quasi-randomization?                                                                                                                                                                                                                                                                                                                                                                                                                                                                                                                                                                                                                                                                                                                                                                                                                                                                                                                                                                                                                                                                                                                                                                                                                                                                                                                                                                                                                                                                                                                                                                                                                                           | N                                 |                                                                                                                                                                                                                    |
| By other action of researchers?                                                                                                                                                                                                                                                                                                                                                                                                                                                                                                                                                                                                                                                                                                                                                                                                                                                                                                                                                                                                                                                                                                                                                                                                                                                                                                                                                                                                                                                                                                                                                                                                                                | N                                 |                                                                                                                                                                                                                    |
| Time differences?                                                                                                                                                                                                                                                                                                                                                                                                                                                                                                                                                                                                                                                                                                                                                                                                                                                                                                                                                                                                                                                                                                                                                                                                                                                                                                                                                                                                                                                                                                                                                                                                                                              | N                                 |                                                                                                                                                                                                                    |
| Location differences?                                                                                                                                                                                                                                                                                                                                                                                                                                                                                                                                                                                                                                                                                                                                                                                                                                                                                                                                                                                                                                                                                                                                                                                                                                                                                                                                                                                                                                                                                                                                                                                                                                          | U                                 |                                                                                                                                                                                                                    |
| Policy/public health decisions?                                                                                                                                                                                                                                                                                                                                                                                                                                                                                                                                                                                                                                                                                                                                                                                                                                                                                                                                                                                                                                                                                                                                                                                                                                                                                                                                                                                                                                                                                                                                                                                                                                | Y                                 |                                                                                                                                                                                                                    |
| Cluster preferences?                                                                                                                                                                                                                                                                                                                                                                                                                                                                                                                                                                                                                                                                                                                                                                                                                                                                                                                                                                                                                                                                                                                                                                                                                                                                                                                                                                                                                                                                                                                                                                                                                                           | U                                 |                                                                                                                                                                                                                    |
| Some other process? (specify)                                                                                                                                                                                                                                                                                                                                                                                                                                                                                                                                                                                                                                                                                                                                                                                                                                                                                                                                                                                                                                                                                                                                                                                                                                                                                                                                                                                                                                                                                                                                                                                                                                  | U                                 |                                                                                                                                                                                                                    |
| <i>Which parts of the study were prospective:</i>                                                                                                                                                                                                                                                                                                                                                                                                                                                                                                                                                                                                                                                                                                                                                                                                                                                                                                                                                                                                                                                                                                                                                                                                                                                                                                                                                                                                                                                                                                                                                                                                              |                                   |                                                                                                                                                                                                                    |
| Identification of participating clusters?                                                                                                                                                                                                                                                                                                                                                                                                                                                                                                                                                                                                                                                                                                                                                                                                                                                                                                                                                                                                                                                                                                                                                                                                                                                                                                                                                                                                                                                                                                                                                                                                                      | N                                 | Administrative database analysis - entirely retrospective                                                                                                                                                          |
| Assessment of baseline and allocation to intervention?                                                                                                                                                                                                                                                                                                                                                                                                                                                                                                                                                                                                                                                                                                                                                                                                                                                                                                                                                                                                                                                                                                                                                                                                                                                                                                                                                                                                                                                                                                                                                                                                         | N                                 |                                                                                                                                                                                                                    |
| Assessment of outcomes?                                                                                                                                                                                                                                                                                                                                                                                                                                                                                                                                                                                                                                                                                                                                                                                                                                                                                                                                                                                                                                                                                                                                                                                                                                                                                                                                                                                                                                                                                                                                                                                                                                        | N                                 |                                                                                                                                                                                                                    |
| Generation of hypotheses?                                                                                                                                                                                                                                                                                                                                                                                                                                                                                                                                                                                                                                                                                                                                                                                                                                                                                                                                                                                                                                                                                                                                                                                                                                                                                                                                                                                                                                                                                                                                                                                                                                      | U                                 |                                                                                                                                                                                                                    |
| <i>On what variables was comparability between groups assessed:</i>                                                                                                                                                                                                                                                                                                                                                                                                                                                                                                                                                                                                                                                                                                                                                                                                                                                                                                                                                                                                                                                                                                                                                                                                                                                                                                                                                                                                                                                                                                                                                                                            |                                   |                                                                                                                                                                                                                    |
| Potential confounders?                                                                                                                                                                                                                                                                                                                                                                                                                                                                                                                                                                                                                                                                                                                                                                                                                                                                                                                                                                                                                                                                                                                                                                                                                                                                                                                                                                                                                                                                                                                                                                                                                                         | Y                                 | "- The regression model controlled for confounders including the covariates: age at diagnosis, disease category, gender and deprivation category."                                                                 |
| Baseline assessment of outcome variables?                                                                                                                                                                                                                                                                                                                                                                                                                                                                                                                                                                                                                                                                                                                                                                                                                                                                                                                                                                                                                                                                                                                                                                                                                                                                                                                                                                                                                                                                                                                                                                                                                      | N                                 |                                                                                                                                                                                                                    |
| <i>Other potential sources of bias/confounding/limitations/comments</i>                                                                                                                                                                                                                                                                                                                                                                                                                                                                                                                                                                                                                                                                                                                                                                                                                                                                                                                                                                                                                                                                                                                                                                                                                                                                                                                                                                                                                                                                                                                                                                                        |                                   |                                                                                                                                                                                                                    |
| <p>-There was no comparison of the outcome variable before the "referral" point between the groups to check for baseline differences.</p> <p>- Whether the patients were still in disease-directed treatment in both groups was not measured and/or controlled, and could be an explanatory factor for decrease in planned admissions.</p> <p>- The authors did not include days spent in hospice for the referred group to complement the total number of admissions for that group. It might conceal some shifting in resource utilization important to be measured in terms of healthcare resources consumption.</p> <p>- In the hospice group, median time from the diagnosis date to referral was calculated by cancer category and then applied to the same category in the control group, to create a point for comparison before/after referral. Interquartile range for time to referral varied widely between categories from 85 to over 1100 days.</p> <p>- Negative binomial regression modeling was used including each person's post referral period in the model as an exposure term.</p> <p>- The patients who did not link to the NHS hospital admission system (10.1%) differed from the patients included in this analysis and tended to be male, diagnosed under age of 5, and diagnosed towards the beginning of the study period.</p> <p>- Among the patients included in the analysis, the groups did differ in some demographics such as smaller % of patients between 15-19 referred to the hospice services, and disease category of Central Nervous System being the largest group disease among those referred to the hospice.</p> |                                   |                                                                                                                                                                                                                    |

|                                                                                                                                                                                                                                                                                                                                                                                                                                                                                                                                                                                                                                                                                                                                                                                                                                                                                                                                                                                                                                                                                                             |                                        |                                                                                                                                                                                                      |
|-------------------------------------------------------------------------------------------------------------------------------------------------------------------------------------------------------------------------------------------------------------------------------------------------------------------------------------------------------------------------------------------------------------------------------------------------------------------------------------------------------------------------------------------------------------------------------------------------------------------------------------------------------------------------------------------------------------------------------------------------------------------------------------------------------------------------------------------------------------------------------------------------------------------------------------------------------------------------------------------------------------------------------------------------------------------------------------------------------------|----------------------------------------|------------------------------------------------------------------------------------------------------------------------------------------------------------------------------------------------------|
| <b>Article</b>                                                                                                                                                                                                                                                                                                                                                                                                                                                                                                                                                                                                                                                                                                                                                                                                                                                                                                                                                                                                                                                                                              | <b>Keele L et al 2013 <sup>2</sup></b> |                                                                                                                                                                                                      |
| <b>Allocation</b>                                                                                                                                                                                                                                                                                                                                                                                                                                                                                                                                                                                                                                                                                                                                                                                                                                                                                                                                                                                                                                                                                           | Individual level                       |                                                                                                                                                                                                      |
| <b>Study design</b>                                                                                                                                                                                                                                                                                                                                                                                                                                                                                                                                                                                                                                                                                                                                                                                                                                                                                                                                                                                                                                                                                         | RCS                                    |                                                                                                                                                                                                      |
| <b>Study design features</b>                                                                                                                                                                                                                                                                                                                                                                                                                                                                                                                                                                                                                                                                                                                                                                                                                                                                                                                                                                                                                                                                                | <b>Support for judgment</b>            |                                                                                                                                                                                                      |
| <i>Was there a comparison:</i>                                                                                                                                                                                                                                                                                                                                                                                                                                                                                                                                                                                                                                                                                                                                                                                                                                                                                                                                                                                                                                                                              |                                        |                                                                                                                                                                                                      |
| Between two or more groups of clusters receiving different interventions?                                                                                                                                                                                                                                                                                                                                                                                                                                                                                                                                                                                                                                                                                                                                                                                                                                                                                                                                                                                                                                   | Y                                      | Database from >40 hospital across USA. Other than the proportion of patients accessing PC services, no other characteristics were compared over time.                                                |
| Within the same group of clusters over time?                                                                                                                                                                                                                                                                                                                                                                                                                                                                                                                                                                                                                                                                                                                                                                                                                                                                                                                                                                                                                                                                | N                                      |                                                                                                                                                                                                      |
| <i>Were participant/clusters allocated to groups by:</i>                                                                                                                                                                                                                                                                                                                                                                                                                                                                                                                                                                                                                                                                                                                                                                                                                                                                                                                                                                                                                                                    |                                        |                                                                                                                                                                                                      |
| Concealed randomization?                                                                                                                                                                                                                                                                                                                                                                                                                                                                                                                                                                                                                                                                                                                                                                                                                                                                                                                                                                                                                                                                                    | N                                      | Based on billing code, which changed overtime according to PC guidelines                                                                                                                             |
| Quasi-randomization?                                                                                                                                                                                                                                                                                                                                                                                                                                                                                                                                                                                                                                                                                                                                                                                                                                                                                                                                                                                                                                                                                        | N                                      |                                                                                                                                                                                                      |
| By other action of researchers?                                                                                                                                                                                                                                                                                                                                                                                                                                                                                                                                                                                                                                                                                                                                                                                                                                                                                                                                                                                                                                                                             | N                                      |                                                                                                                                                                                                      |
| Time differences?                                                                                                                                                                                                                                                                                                                                                                                                                                                                                                                                                                                                                                                                                                                                                                                                                                                                                                                                                                                                                                                                                           | N                                      |                                                                                                                                                                                                      |
| Location differences?                                                                                                                                                                                                                                                                                                                                                                                                                                                                                                                                                                                                                                                                                                                                                                                                                                                                                                                                                                                                                                                                                       | N                                      |                                                                                                                                                                                                      |
| Policy/public health decisions?                                                                                                                                                                                                                                                                                                                                                                                                                                                                                                                                                                                                                                                                                                                                                                                                                                                                                                                                                                                                                                                                             | Y                                      |                                                                                                                                                                                                      |
| Cluster preferences?                                                                                                                                                                                                                                                                                                                                                                                                                                                                                                                                                                                                                                                                                                                                                                                                                                                                                                                                                                                                                                                                                        | U                                      |                                                                                                                                                                                                      |
| Some other process? (specify)                                                                                                                                                                                                                                                                                                                                                                                                                                                                                                                                                                                                                                                                                                                                                                                                                                                                                                                                                                                                                                                                               | U                                      |                                                                                                                                                                                                      |
| <i>Which parts of the study were prospective:</i>                                                                                                                                                                                                                                                                                                                                                                                                                                                                                                                                                                                                                                                                                                                                                                                                                                                                                                                                                                                                                                                           |                                        |                                                                                                                                                                                                      |
| Identification of participating clusters?                                                                                                                                                                                                                                                                                                                                                                                                                                                                                                                                                                                                                                                                                                                                                                                                                                                                                                                                                                                                                                                                   | N                                      | Administrative database analysis - entirely retrospective                                                                                                                                            |
| Assessment of baseline and allocation to intervention?                                                                                                                                                                                                                                                                                                                                                                                                                                                                                                                                                                                                                                                                                                                                                                                                                                                                                                                                                                                                                                                      | N                                      |                                                                                                                                                                                                      |
| Assessment of outcomes?                                                                                                                                                                                                                                                                                                                                                                                                                                                                                                                                                                                                                                                                                                                                                                                                                                                                                                                                                                                                                                                                                     | N                                      |                                                                                                                                                                                                      |
| Generation of hypotheses?                                                                                                                                                                                                                                                                                                                                                                                                                                                                                                                                                                                                                                                                                                                                                                                                                                                                                                                                                                                                                                                                                   | N                                      |                                                                                                                                                                                                      |
| <i>On what variables was comparability between groups assessed:</i>                                                                                                                                                                                                                                                                                                                                                                                                                                                                                                                                                                                                                                                                                                                                                                                                                                                                                                                                                                                                                                         |                                        |                                                                                                                                                                                                      |
| Potential confounders?                                                                                                                                                                                                                                                                                                                                                                                                                                                                                                                                                                                                                                                                                                                                                                                                                                                                                                                                                                                                                                                                                      | Y                                      | LOS and Cost were not adjusted for by possible confounders, other than geography. Differences in the distribution of certain characteristics were presented (age, health insurance, race, diagnosis) |
| Baseline assessment of outcome variables?                                                                                                                                                                                                                                                                                                                                                                                                                                                                                                                                                                                                                                                                                                                                                                                                                                                                                                                                                                                                                                                                   | N                                      |                                                                                                                                                                                                      |
| <i>Other potential sources of bias/confounding/limitations/comments</i>                                                                                                                                                                                                                                                                                                                                                                                                                                                                                                                                                                                                                                                                                                                                                                                                                                                                                                                                                                                                                                     |                                        |                                                                                                                                                                                                      |
| <ul style="list-style-type: none"> <li>- Children who received PC consultations in the last admission before death were different in some characteristics such as older age, race distributions with less access by blacks, having more private insurance, and increase access along the years.</li> <li>- Diseases categories varied significantly. In a subgroup analysis of complex chronic conditions (CCCs) patients (85% of the entire cohort) compared to those not having CCCs, patients with CCCs were more likely to have had a PC consultation (RR 2.2; 95% CI 1.7–2.8).</li> <li>- Comparison included all causes of death, no subgroup analysis for CCC group were presented on the differences in demographics and clinical characteristics.</li> <li>- The authors discussed limitations of the study regards to exclusion of patients discharged under hospice program and admissions &lt; 5 days, which may have underestimated the total numbers.</li> <li>- Changes in coding practices and maturation of PPCP also represent a potential bias because it cannot be measured.</li> </ul> |                                        |                                                                                                                                                                                                      |

|                                                                                                                                                                                                                                                                                                                                                                                                                                                                                                                                                                                                                                                                                                                                                                                                                                                                                                                                                                                                                                                                                                                                                            |   |                                                                                                                                                                                                                                                                                                                                                                                        |
|------------------------------------------------------------------------------------------------------------------------------------------------------------------------------------------------------------------------------------------------------------------------------------------------------------------------------------------------------------------------------------------------------------------------------------------------------------------------------------------------------------------------------------------------------------------------------------------------------------------------------------------------------------------------------------------------------------------------------------------------------------------------------------------------------------------------------------------------------------------------------------------------------------------------------------------------------------------------------------------------------------------------------------------------------------------------------------------------------------------------------------------------------------|---|----------------------------------------------------------------------------------------------------------------------------------------------------------------------------------------------------------------------------------------------------------------------------------------------------------------------------------------------------------------------------------------|
| <b>Article</b>                                                                                                                                                                                                                                                                                                                                                                                                                                                                                                                                                                                                                                                                                                                                                                                                                                                                                                                                                                                                                                                                                                                                             |   | <b>Dussel V et al 2009<sup>3</sup></b>                                                                                                                                                                                                                                                                                                                                                 |
| <b>Allocation</b>                                                                                                                                                                                                                                                                                                                                                                                                                                                                                                                                                                                                                                                                                                                                                                                                                                                                                                                                                                                                                                                                                                                                          |   | Individual level                                                                                                                                                                                                                                                                                                                                                                       |
| <b>Study design</b>                                                                                                                                                                                                                                                                                                                                                                                                                                                                                                                                                                                                                                                                                                                                                                                                                                                                                                                                                                                                                                                                                                                                        |   | RCS                                                                                                                                                                                                                                                                                                                                                                                    |
| <b>Study design features</b>                                                                                                                                                                                                                                                                                                                                                                                                                                                                                                                                                                                                                                                                                                                                                                                                                                                                                                                                                                                                                                                                                                                               |   | <b>Support for judgment</b>                                                                                                                                                                                                                                                                                                                                                            |
| <i>Was there a comparison:</i>                                                                                                                                                                                                                                                                                                                                                                                                                                                                                                                                                                                                                                                                                                                                                                                                                                                                                                                                                                                                                                                                                                                             |   |                                                                                                                                                                                                                                                                                                                                                                                        |
| Between two or more groups of clusters receiving different interventions?                                                                                                                                                                                                                                                                                                                                                                                                                                                                                                                                                                                                                                                                                                                                                                                                                                                                                                                                                                                                                                                                                  | Y | Cross-sectional survey with retrospective chart review + retrospective cohort comparison.                                                                                                                                                                                                                                                                                              |
| Within the same group of clusters over time?                                                                                                                                                                                                                                                                                                                                                                                                                                                                                                                                                                                                                                                                                                                                                                                                                                                                                                                                                                                                                                                                                                               | Y |                                                                                                                                                                                                                                                                                                                                                                                        |
| <i>Were participant/clusters allocated to groups by:</i>                                                                                                                                                                                                                                                                                                                                                                                                                                                                                                                                                                                                                                                                                                                                                                                                                                                                                                                                                                                                                                                                                                   |   |                                                                                                                                                                                                                                                                                                                                                                                        |
| Concealed randomization?                                                                                                                                                                                                                                                                                                                                                                                                                                                                                                                                                                                                                                                                                                                                                                                                                                                                                                                                                                                                                                                                                                                                   | N | Based on survey responses, children from 2 clusters were separated in to 2 groups (had or had not planned the LOD by their parents).                                                                                                                                                                                                                                                   |
| Quasi-randomization?                                                                                                                                                                                                                                                                                                                                                                                                                                                                                                                                                                                                                                                                                                                                                                                                                                                                                                                                                                                                                                                                                                                                       | N |                                                                                                                                                                                                                                                                                                                                                                                        |
| By other action of researchers?                                                                                                                                                                                                                                                                                                                                                                                                                                                                                                                                                                                                                                                                                                                                                                                                                                                                                                                                                                                                                                                                                                                            | Y |                                                                                                                                                                                                                                                                                                                                                                                        |
| Time differences?                                                                                                                                                                                                                                                                                                                                                                                                                                                                                                                                                                                                                                                                                                                                                                                                                                                                                                                                                                                                                                                                                                                                          | N |                                                                                                                                                                                                                                                                                                                                                                                        |
| Location differences?                                                                                                                                                                                                                                                                                                                                                                                                                                                                                                                                                                                                                                                                                                                                                                                                                                                                                                                                                                                                                                                                                                                                      | N |                                                                                                                                                                                                                                                                                                                                                                                        |
| Policy/public health decisions?                                                                                                                                                                                                                                                                                                                                                                                                                                                                                                                                                                                                                                                                                                                                                                                                                                                                                                                                                                                                                                                                                                                            | Y |                                                                                                                                                                                                                                                                                                                                                                                        |
| Cluster preferences?                                                                                                                                                                                                                                                                                                                                                                                                                                                                                                                                                                                                                                                                                                                                                                                                                                                                                                                                                                                                                                                                                                                                       | U |                                                                                                                                                                                                                                                                                                                                                                                        |
| Some other process? (specify)                                                                                                                                                                                                                                                                                                                                                                                                                                                                                                                                                                                                                                                                                                                                                                                                                                                                                                                                                                                                                                                                                                                              | U |                                                                                                                                                                                                                                                                                                                                                                                        |
| <i>Which parts of the study were prospective:</i>                                                                                                                                                                                                                                                                                                                                                                                                                                                                                                                                                                                                                                                                                                                                                                                                                                                                                                                                                                                                                                                                                                          |   |                                                                                                                                                                                                                                                                                                                                                                                        |
| Identification of participating clusters?                                                                                                                                                                                                                                                                                                                                                                                                                                                                                                                                                                                                                                                                                                                                                                                                                                                                                                                                                                                                                                                                                                                  | N | <ul style="list-style-type: none"> <li>• Retrospective chart review</li> <li>• Cross-sectional survey</li> </ul>                                                                                                                                                                                                                                                                       |
| Assessment of baseline and allocation to intervention?                                                                                                                                                                                                                                                                                                                                                                                                                                                                                                                                                                                                                                                                                                                                                                                                                                                                                                                                                                                                                                                                                                     | N |                                                                                                                                                                                                                                                                                                                                                                                        |
| Assessment of outcomes?                                                                                                                                                                                                                                                                                                                                                                                                                                                                                                                                                                                                                                                                                                                                                                                                                                                                                                                                                                                                                                                                                                                                    | N |                                                                                                                                                                                                                                                                                                                                                                                        |
| Generation of hypotheses?                                                                                                                                                                                                                                                                                                                                                                                                                                                                                                                                                                                                                                                                                                                                                                                                                                                                                                                                                                                                                                                                                                                                  | U |                                                                                                                                                                                                                                                                                                                                                                                        |
| <i>On what variables was comparability between groups assessed:</i>                                                                                                                                                                                                                                                                                                                                                                                                                                                                                                                                                                                                                                                                                                                                                                                                                                                                                                                                                                                                                                                                                        |   |                                                                                                                                                                                                                                                                                                                                                                                        |
| Potential confounders?                                                                                                                                                                                                                                                                                                                                                                                                                                                                                                                                                                                                                                                                                                                                                                                                                                                                                                                                                                                                                                                                                                                                     | Y | <ul style="list-style-type: none"> <li>• For the determinants of having or not having planned LOD, there was some control for confounders. For the health resource utilization, no confounding was addressed.</li> <li>• The impact of LOD planning on healthcare resources was a secondary outcome and was not controlled for any confounder, nor was it further explored.</li> </ul> |
| Baseline assessment of outcome variables?                                                                                                                                                                                                                                                                                                                                                                                                                                                                                                                                                                                                                                                                                                                                                                                                                                                                                                                                                                                                                                                                                                                  | N |                                                                                                                                                                                                                                                                                                                                                                                        |
| <i>Other potential sources of bias/confounding/limitations/comments</i>                                                                                                                                                                                                                                                                                                                                                                                                                                                                                                                                                                                                                                                                                                                                                                                                                                                                                                                                                                                                                                                                                    |   |                                                                                                                                                                                                                                                                                                                                                                                        |
| <p>- Eligibility of the families depended upon physician's consent, which was declined for 19 families. It might introduce some selection bias.</p> <p>- Only one parent was interviewed which might have introduced some non-response bias.</p> <p>- Some interviews were done long time after the fact which might represent some recall bias (median 3 years).</p> <p>- Response rate 64%. The non-respondents were similar at child's age at death and diagnosis.</p> <p>- The study used regression with stepwise approach to study the determinants of planning LOD and control for confounders. The authors run sensitivity analysis for missing data and by physicians cluster. No differences in the results were shown.</p> <p>- Children with hematological cancer, those who died from treatment related complications, those families who were very religious were less likely to have planned LOD.</p> <p>- Children who had private insurance, families who had experience previous losses, those who reported that oncologist clearly explained treatment options and those who access home care were more likely to have planned LOD.</p> |   |                                                                                                                                                                                                                                                                                                                                                                                        |

|                |                                        |
|----------------|----------------------------------------|
| <b>Article</b> | <b>Knapp CA et al 2009<sup>4</sup></b> |
|----------------|----------------------------------------|

|                                                                                                                                                                                                                                                                                                                                                                                                                                                                                                                                                                 |   |                                                                                                                                                                                                                                                                                                                                                                   |
|-----------------------------------------------------------------------------------------------------------------------------------------------------------------------------------------------------------------------------------------------------------------------------------------------------------------------------------------------------------------------------------------------------------------------------------------------------------------------------------------------------------------------------------------------------------------|---|-------------------------------------------------------------------------------------------------------------------------------------------------------------------------------------------------------------------------------------------------------------------------------------------------------------------------------------------------------------------|
| <b>Allocation</b>                                                                                                                                                                                                                                                                                                                                                                                                                                                                                                                                               |   | Individual level                                                                                                                                                                                                                                                                                                                                                  |
| <b>Study design</b>                                                                                                                                                                                                                                                                                                                                                                                                                                                                                                                                             |   | RCS                                                                                                                                                                                                                                                                                                                                                               |
| <b>Study design features</b>                                                                                                                                                                                                                                                                                                                                                                                                                                                                                                                                    |   | <b>Support for judgment</b>                                                                                                                                                                                                                                                                                                                                       |
| <i>Was there a comparison:</i>                                                                                                                                                                                                                                                                                                                                                                                                                                                                                                                                  |   |                                                                                                                                                                                                                                                                                                                                                                   |
| Between two or more groups of clusters receiving different interventions?                                                                                                                                                                                                                                                                                                                                                                                                                                                                                       | Y | Included children from several hospitals and hospice catchment areas within province                                                                                                                                                                                                                                                                              |
| Within the same group of clusters over time?                                                                                                                                                                                                                                                                                                                                                                                                                                                                                                                    | Y |                                                                                                                                                                                                                                                                                                                                                                   |
| <i>Were participant/clusters allocated to groups by:</i>                                                                                                                                                                                                                                                                                                                                                                                                                                                                                                        |   |                                                                                                                                                                                                                                                                                                                                                                   |
| Concealed randomization?                                                                                                                                                                                                                                                                                                                                                                                                                                                                                                                                        | N | The authors allocated the 2 groups based on claims for hospice services. Limitations from unbilled and unpaid services existed as 5 patients in the non-hospice user group died in hospice.                                                                                                                                                                       |
| Quasi-randomization?                                                                                                                                                                                                                                                                                                                                                                                                                                                                                                                                            | N |                                                                                                                                                                                                                                                                                                                                                                   |
| By other action of researchers?                                                                                                                                                                                                                                                                                                                                                                                                                                                                                                                                 | Y |                                                                                                                                                                                                                                                                                                                                                                   |
| Time differences?                                                                                                                                                                                                                                                                                                                                                                                                                                                                                                                                               | N |                                                                                                                                                                                                                                                                                                                                                                   |
| Location differences?                                                                                                                                                                                                                                                                                                                                                                                                                                                                                                                                           | N |                                                                                                                                                                                                                                                                                                                                                                   |
| Policy/public health decisions?                                                                                                                                                                                                                                                                                                                                                                                                                                                                                                                                 | Y |                                                                                                                                                                                                                                                                                                                                                                   |
| Cluster preferences?                                                                                                                                                                                                                                                                                                                                                                                                                                                                                                                                            | U |                                                                                                                                                                                                                                                                                                                                                                   |
| Some other process? (specify)                                                                                                                                                                                                                                                                                                                                                                                                                                                                                                                                   | U |                                                                                                                                                                                                                                                                                                                                                                   |
| <i>Which parts of the study were prospective:</i>                                                                                                                                                                                                                                                                                                                                                                                                                                                                                                               |   |                                                                                                                                                                                                                                                                                                                                                                   |
| Identification of participating clusters?                                                                                                                                                                                                                                                                                                                                                                                                                                                                                                                       | N | Administrative database entirely retrospective                                                                                                                                                                                                                                                                                                                    |
| Assessment of baseline and allocation to intervention?                                                                                                                                                                                                                                                                                                                                                                                                                                                                                                          | N |                                                                                                                                                                                                                                                                                                                                                                   |
| Assessment of outcomes?                                                                                                                                                                                                                                                                                                                                                                                                                                                                                                                                         | N |                                                                                                                                                                                                                                                                                                                                                                   |
| Generation of hypotheses?                                                                                                                                                                                                                                                                                                                                                                                                                                                                                                                                       | U |                                                                                                                                                                                                                                                                                                                                                                   |
| <i>On what variables was comparability between groups assessed:</i>                                                                                                                                                                                                                                                                                                                                                                                                                                                                                             |   |                                                                                                                                                                                                                                                                                                                                                                   |
| Potential confounders?                                                                                                                                                                                                                                                                                                                                                                                                                                                                                                                                          | N | There was subgroup analysis per diagnosis group but no regression was carried to control for other covariates (e.g. gender, race, length of enrollment in the insurance, etc.) to determine differences in healthcare expenditures between groups.<br>No statistical test was applied to check significant differences between groups in healthcare expenditures. |
| Baseline assessment of outcome variables?                                                                                                                                                                                                                                                                                                                                                                                                                                                                                                                       | N |                                                                                                                                                                                                                                                                                                                                                                   |
| <i>Other potential sources of bias/confounding/limitations/comments</i>                                                                                                                                                                                                                                                                                                                                                                                                                                                                                         |   |                                                                                                                                                                                                                                                                                                                                                                   |
| <p>- Although the authors found some patients' characteristics to be associated to more or less hospice use, when analyzing the expenditures, only subgroup analysis by diagnostic category were presented. No other factor was control as confounders (gender, race and time enrolled in the Medicaid program, place of death).</p> <p>- The authors discussed the limitations of the study such as the limited generalizability for children with private insurance or uninsured, which represents 2/3 of the pediatric population dying in the province.</p> |   |                                                                                                                                                                                                                                                                                                                                                                   |

|                                                                                                                                                                                                                                                                                                                                                                                                                                                                                                                                                                                                                                                                                                                                                                                                                                                                                                                                                                                                                                                                                                                                                                                                                                                                                                       |    |                                                                                                                                                                                                                                 |  |
|-------------------------------------------------------------------------------------------------------------------------------------------------------------------------------------------------------------------------------------------------------------------------------------------------------------------------------------------------------------------------------------------------------------------------------------------------------------------------------------------------------------------------------------------------------------------------------------------------------------------------------------------------------------------------------------------------------------------------------------------------------------------------------------------------------------------------------------------------------------------------------------------------------------------------------------------------------------------------------------------------------------------------------------------------------------------------------------------------------------------------------------------------------------------------------------------------------------------------------------------------------------------------------------------------------|----|---------------------------------------------------------------------------------------------------------------------------------------------------------------------------------------------------------------------------------|--|
| <b>Article</b>                                                                                                                                                                                                                                                                                                                                                                                                                                                                                                                                                                                                                                                                                                                                                                                                                                                                                                                                                                                                                                                                                                                                                                                                                                                                                        |    | <b>Arland LC et al 2013<sup>5</sup></b>                                                                                                                                                                                         |  |
| <b>Allocation</b>                                                                                                                                                                                                                                                                                                                                                                                                                                                                                                                                                                                                                                                                                                                                                                                                                                                                                                                                                                                                                                                                                                                                                                                                                                                                                     |    | Group Level                                                                                                                                                                                                                     |  |
| <b>Study design</b>                                                                                                                                                                                                                                                                                                                                                                                                                                                                                                                                                                                                                                                                                                                                                                                                                                                                                                                                                                                                                                                                                                                                                                                                                                                                                   |    | ChBA                                                                                                                                                                                                                            |  |
| <b>Study design features</b>                                                                                                                                                                                                                                                                                                                                                                                                                                                                                                                                                                                                                                                                                                                                                                                                                                                                                                                                                                                                                                                                                                                                                                                                                                                                          |    | <b>Support for judgment</b>                                                                                                                                                                                                     |  |
| <i>Was there a comparison:</i>                                                                                                                                                                                                                                                                                                                                                                                                                                                                                                                                                                                                                                                                                                                                                                                                                                                                                                                                                                                                                                                                                                                                                                                                                                                                        |    |                                                                                                                                                                                                                                 |  |
| Between two or more groups of clusters receiving different interventions?                                                                                                                                                                                                                                                                                                                                                                                                                                                                                                                                                                                                                                                                                                                                                                                                                                                                                                                                                                                                                                                                                                                                                                                                                             | N  | Children with brain tumors from a single pediatric-oncology department that implemented an EOL program                                                                                                                          |  |
| Within the same group of clusters over time?                                                                                                                                                                                                                                                                                                                                                                                                                                                                                                                                                                                                                                                                                                                                                                                                                                                                                                                                                                                                                                                                                                                                                                                                                                                          | Y  |                                                                                                                                                                                                                                 |  |
| <i>Were participant/clusters allocated to groups by:</i>                                                                                                                                                                                                                                                                                                                                                                                                                                                                                                                                                                                                                                                                                                                                                                                                                                                                                                                                                                                                                                                                                                                                                                                                                                              |    |                                                                                                                                                                                                                                 |  |
| Concealed randomization?                                                                                                                                                                                                                                                                                                                                                                                                                                                                                                                                                                                                                                                                                                                                                                                                                                                                                                                                                                                                                                                                                                                                                                                                                                                                              | N  | Study Before/after the implementation of a standardized EOL program carried by a hospital                                                                                                                                       |  |
| Quasi-randomization?                                                                                                                                                                                                                                                                                                                                                                                                                                                                                                                                                                                                                                                                                                                                                                                                                                                                                                                                                                                                                                                                                                                                                                                                                                                                                  | N  |                                                                                                                                                                                                                                 |  |
| By other action of researchers?                                                                                                                                                                                                                                                                                                                                                                                                                                                                                                                                                                                                                                                                                                                                                                                                                                                                                                                                                                                                                                                                                                                                                                                                                                                                       | N  |                                                                                                                                                                                                                                 |  |
| Time differences?                                                                                                                                                                                                                                                                                                                                                                                                                                                                                                                                                                                                                                                                                                                                                                                                                                                                                                                                                                                                                                                                                                                                                                                                                                                                                     | Y  |                                                                                                                                                                                                                                 |  |
| Location differences?                                                                                                                                                                                                                                                                                                                                                                                                                                                                                                                                                                                                                                                                                                                                                                                                                                                                                                                                                                                                                                                                                                                                                                                                                                                                                 | N  |                                                                                                                                                                                                                                 |  |
| Policy/public health decisions?                                                                                                                                                                                                                                                                                                                                                                                                                                                                                                                                                                                                                                                                                                                                                                                                                                                                                                                                                                                                                                                                                                                                                                                                                                                                       | Y  |                                                                                                                                                                                                                                 |  |
| Cluster preferences?                                                                                                                                                                                                                                                                                                                                                                                                                                                                                                                                                                                                                                                                                                                                                                                                                                                                                                                                                                                                                                                                                                                                                                                                                                                                                  | na |                                                                                                                                                                                                                                 |  |
| Some other process? (specify)                                                                                                                                                                                                                                                                                                                                                                                                                                                                                                                                                                                                                                                                                                                                                                                                                                                                                                                                                                                                                                                                                                                                                                                                                                                                         | na |                                                                                                                                                                                                                                 |  |
| <i>Which parts of the study were prospective:</i>                                                                                                                                                                                                                                                                                                                                                                                                                                                                                                                                                                                                                                                                                                                                                                                                                                                                                                                                                                                                                                                                                                                                                                                                                                                     |    |                                                                                                                                                                                                                                 |  |
| Identification of participating clusters?                                                                                                                                                                                                                                                                                                                                                                                                                                                                                                                                                                                                                                                                                                                                                                                                                                                                                                                                                                                                                                                                                                                                                                                                                                                             | N  | Chart review entirely prospective                                                                                                                                                                                               |  |
| Assessment of baseline and allocation to intervention?                                                                                                                                                                                                                                                                                                                                                                                                                                                                                                                                                                                                                                                                                                                                                                                                                                                                                                                                                                                                                                                                                                                                                                                                                                                | N  |                                                                                                                                                                                                                                 |  |
| Assessment of outcomes?                                                                                                                                                                                                                                                                                                                                                                                                                                                                                                                                                                                                                                                                                                                                                                                                                                                                                                                                                                                                                                                                                                                                                                                                                                                                               | N  |                                                                                                                                                                                                                                 |  |
| Generation of hypotheses?                                                                                                                                                                                                                                                                                                                                                                                                                                                                                                                                                                                                                                                                                                                                                                                                                                                                                                                                                                                                                                                                                                                                                                                                                                                                             | U  |                                                                                                                                                                                                                                 |  |
| <i>On what variables was comparability between groups assessed:</i>                                                                                                                                                                                                                                                                                                                                                                                                                                                                                                                                                                                                                                                                                                                                                                                                                                                                                                                                                                                                                                                                                                                                                                                                                                   |    |                                                                                                                                                                                                                                 |  |
| Potential confounders?                                                                                                                                                                                                                                                                                                                                                                                                                                                                                                                                                                                                                                                                                                                                                                                                                                                                                                                                                                                                                                                                                                                                                                                                                                                                                | N  | Authors disclosed not having addressed any potential confounders, and difficulties with missing data (demographics), unclear EOL periods before the program was implemented, and changes in treatment course/disease management |  |
| Baseline assessment of outcome variables?                                                                                                                                                                                                                                                                                                                                                                                                                                                                                                                                                                                                                                                                                                                                                                                                                                                                                                                                                                                                                                                                                                                                                                                                                                                             | na |                                                                                                                                                                                                                                 |  |
| <i>Other potential sources of bias/confounding/limitations/comments</i>                                                                                                                                                                                                                                                                                                                                                                                                                                                                                                                                                                                                                                                                                                                                                                                                                                                                                                                                                                                                                                                                                                                                                                                                                               |    |                                                                                                                                                                                                                                 |  |
| <p>- The groups had different criteria to determine EOL period. Several individuals in the historical control had EOL determined based on radiology reports of the disease progression, which does not mean they had been treated as EOL patients. The intervention group had a date for EOL discussion, referral to hospice or complete DNR order. The historical control cohort period was reduced because there was no formal onco-pediatric program previous to this date compromising the quality of data quality.</p> <p>- Authors explain exclusion of only 22/52 patients excluded from the initial cohort of 166 patients.</p> <p>- The authors aimed to measure symptoms but did not present any data on that other than hospitalizations. Likewise, they stated fewer complication after the implementation of the program but did not show any data.</p> <p>- No demographic data comparison was presented. No ethics approval was mentioned.</p> <p>- Although the authors extensively stated the limitations for the study such as temporality, demographics information missing, no symptom measurement scale available, maturation of the disease management and EOL care, changes in health insurance policies, no statistical analysis were applied to some presented outcomes.</p> |    |                                                                                                                                                                                                                                 |  |

|                                                                                                                                                                                                                                                                                                                                                                                                                                                                                                                                                                                                                                                                                                                                                                                                                                        |                                       |                                                                                                                  |
|----------------------------------------------------------------------------------------------------------------------------------------------------------------------------------------------------------------------------------------------------------------------------------------------------------------------------------------------------------------------------------------------------------------------------------------------------------------------------------------------------------------------------------------------------------------------------------------------------------------------------------------------------------------------------------------------------------------------------------------------------------------------------------------------------------------------------------------|---------------------------------------|------------------------------------------------------------------------------------------------------------------|
| <b>Article</b>                                                                                                                                                                                                                                                                                                                                                                                                                                                                                                                                                                                                                                                                                                                                                                                                                         | <b>Postier et al 2014<sup>6</sup></b> |                                                                                                                  |
| <b>Allocation</b>                                                                                                                                                                                                                                                                                                                                                                                                                                                                                                                                                                                                                                                                                                                                                                                                                      | Individual level                      |                                                                                                                  |
| <b>Study design</b>                                                                                                                                                                                                                                                                                                                                                                                                                                                                                                                                                                                                                                                                                                                                                                                                                    | ChBA                                  |                                                                                                                  |
| <b>Study design features</b>                                                                                                                                                                                                                                                                                                                                                                                                                                                                                                                                                                                                                                                                                                                                                                                                           | <b>Support for judgment</b>           |                                                                                                                  |
| <i>Was there a comparison:</i>                                                                                                                                                                                                                                                                                                                                                                                                                                                                                                                                                                                                                                                                                                                                                                                                         |                                       |                                                                                                                  |
| Between two or more groups of clusters receiving different interventions?                                                                                                                                                                                                                                                                                                                                                                                                                                                                                                                                                                                                                                                                                                                                                              | N                                     | Children enrolled in the PPCP carried by a tertiary provider<br>Pre/Post cost and hospital admissions comparison |
| Within the same group of clusters over time?                                                                                                                                                                                                                                                                                                                                                                                                                                                                                                                                                                                                                                                                                                                                                                                           | Y                                     |                                                                                                                  |
| <i>Were participant/clusters allocated to groups by:</i>                                                                                                                                                                                                                                                                                                                                                                                                                                                                                                                                                                                                                                                                                                                                                                               |                                       |                                                                                                                  |
| Concealed randomization?                                                                                                                                                                                                                                                                                                                                                                                                                                                                                                                                                                                                                                                                                                                                                                                                               | N                                     | Authors classified the pre/post period based on the first day of PPCP/hospice program utilization                |
| Quasi-randomization?                                                                                                                                                                                                                                                                                                                                                                                                                                                                                                                                                                                                                                                                                                                                                                                                                   | N                                     |                                                                                                                  |
| By other action of researchers?                                                                                                                                                                                                                                                                                                                                                                                                                                                                                                                                                                                                                                                                                                                                                                                                        | Y                                     |                                                                                                                  |
| Time differences?                                                                                                                                                                                                                                                                                                                                                                                                                                                                                                                                                                                                                                                                                                                                                                                                                      | N                                     |                                                                                                                  |
| Location differences?                                                                                                                                                                                                                                                                                                                                                                                                                                                                                                                                                                                                                                                                                                                                                                                                                  | N                                     |                                                                                                                  |
| Policy/public health decisions?                                                                                                                                                                                                                                                                                                                                                                                                                                                                                                                                                                                                                                                                                                                                                                                                        | N                                     |                                                                                                                  |
| Cluster preferences?                                                                                                                                                                                                                                                                                                                                                                                                                                                                                                                                                                                                                                                                                                                                                                                                                   | U                                     |                                                                                                                  |
| Some other process? (specify)                                                                                                                                                                                                                                                                                                                                                                                                                                                                                                                                                                                                                                                                                                                                                                                                          | U                                     |                                                                                                                  |
| <i>Which parts of the study were prospective:</i>                                                                                                                                                                                                                                                                                                                                                                                                                                                                                                                                                                                                                                                                                                                                                                                      |                                       |                                                                                                                  |
| Identification of participating clusters?                                                                                                                                                                                                                                                                                                                                                                                                                                                                                                                                                                                                                                                                                                                                                                                              | N                                     | Administrative database entirely retrospective                                                                   |
| Assessment of baseline and allocation to intervention?                                                                                                                                                                                                                                                                                                                                                                                                                                                                                                                                                                                                                                                                                                                                                                                 | N                                     |                                                                                                                  |
| Assessment of outcomes?                                                                                                                                                                                                                                                                                                                                                                                                                                                                                                                                                                                                                                                                                                                                                                                                                | N                                     |                                                                                                                  |
| Generation of hypotheses?                                                                                                                                                                                                                                                                                                                                                                                                                                                                                                                                                                                                                                                                                                                                                                                                              | N                                     |                                                                                                                  |
| <i>On what variables was comparability between groups assessed:</i>                                                                                                                                                                                                                                                                                                                                                                                                                                                                                                                                                                                                                                                                                                                                                                    |                                       |                                                                                                                  |
| Potential confounders?                                                                                                                                                                                                                                                                                                                                                                                                                                                                                                                                                                                                                                                                                                                                                                                                                 | Y                                     | Multivariate regression accounting for exposure to the program, disease group and study period                   |
| Baseline assessment of outcome variables?                                                                                                                                                                                                                                                                                                                                                                                                                                                                                                                                                                                                                                                                                                                                                                                              | Y                                     |                                                                                                                  |
| <i>Other potential sources of bias/confounding/limitations/comments</i>                                                                                                                                                                                                                                                                                                                                                                                                                                                                                                                                                                                                                                                                                                                                                                |                                       |                                                                                                                  |
| <ul style="list-style-type: none"> <li>- As any other pre/post design without a control group for comparison, it's unclear whether the observed decrease in LOS and charges are due to the PPCP or a natural trend among those type of patients.</li> <li>- It is not clear the proportion of patients who died at the hospital/home, which would deeply affect charges closer to death.</li> <li>- Selection bias regards to referral are always present in this type of program.</li> <li>- Charges with home care were not accounted for.</li> <li>- Non-parametric test applied to compare the outcomes pre/post does not take into account the different time of exposure to the program which may overestimate the differences between pre/post.</li> <li>- Authors do not report the estimates from the regressions.</li> </ul> |                                       |                                                                                                                  |

|                                                                                                                                                                                                                                                                                                                                                                                                                                                                                                                                                                                                                                                                                                                                                                                                                                                                                                                                                                                                                                                                                   |                                      |                                                                                                                                                             |
|-----------------------------------------------------------------------------------------------------------------------------------------------------------------------------------------------------------------------------------------------------------------------------------------------------------------------------------------------------------------------------------------------------------------------------------------------------------------------------------------------------------------------------------------------------------------------------------------------------------------------------------------------------------------------------------------------------------------------------------------------------------------------------------------------------------------------------------------------------------------------------------------------------------------------------------------------------------------------------------------------------------------------------------------------------------------------------------|--------------------------------------|-------------------------------------------------------------------------------------------------------------------------------------------------------------|
| <b>Article</b>                                                                                                                                                                                                                                                                                                                                                                                                                                                                                                                                                                                                                                                                                                                                                                                                                                                                                                                                                                                                                                                                    | <b>Gans D et al 2012<sup>7</sup></b> |                                                                                                                                                             |
| <b>Allocation</b>                                                                                                                                                                                                                                                                                                                                                                                                                                                                                                                                                                                                                                                                                                                                                                                                                                                                                                                                                                                                                                                                 | Individual level                     |                                                                                                                                                             |
| <b>Study design</b>                                                                                                                                                                                                                                                                                                                                                                                                                                                                                                                                                                                                                                                                                                                                                                                                                                                                                                                                                                                                                                                               | ChBA                                 |                                                                                                                                                             |
| <b>Study design features</b>                                                                                                                                                                                                                                                                                                                                                                                                                                                                                                                                                                                                                                                                                                                                                                                                                                                                                                                                                                                                                                                      | <b>Support for judgment</b>          |                                                                                                                                                             |
| <i>Was there a comparison:</i>                                                                                                                                                                                                                                                                                                                                                                                                                                                                                                                                                                                                                                                                                                                                                                                                                                                                                                                                                                                                                                                    |                                      |                                                                                                                                                             |
| Between two or more groups of clusters receiving different interventions?                                                                                                                                                                                                                                                                                                                                                                                                                                                                                                                                                                                                                                                                                                                                                                                                                                                                                                                                                                                                         | Y                                    | Children enrolled in the community palliative care program in California, using several healthcare providers in different counties                          |
| Within the same group of clusters over time?                                                                                                                                                                                                                                                                                                                                                                                                                                                                                                                                                                                                                                                                                                                                                                                                                                                                                                                                                                                                                                      | Y                                    |                                                                                                                                                             |
| <i>Were participant/clusters allocated to groups by:</i>                                                                                                                                                                                                                                                                                                                                                                                                                                                                                                                                                                                                                                                                                                                                                                                                                                                                                                                                                                                                                          |                                      |                                                                                                                                                             |
| Concealed randomization?                                                                                                                                                                                                                                                                                                                                                                                                                                                                                                                                                                                                                                                                                                                                                                                                                                                                                                                                                                                                                                                          | N                                    | Before-after enrollment in the program criteria not clearly stated. It seems to be a registry for the enrollees.                                            |
| Quasi-randomization?                                                                                                                                                                                                                                                                                                                                                                                                                                                                                                                                                                                                                                                                                                                                                                                                                                                                                                                                                                                                                                                              | N                                    |                                                                                                                                                             |
| By other action of researchers?                                                                                                                                                                                                                                                                                                                                                                                                                                                                                                                                                                                                                                                                                                                                                                                                                                                                                                                                                                                                                                                   | N                                    |                                                                                                                                                             |
| Time differences?                                                                                                                                                                                                                                                                                                                                                                                                                                                                                                                                                                                                                                                                                                                                                                                                                                                                                                                                                                                                                                                                 | Y                                    |                                                                                                                                                             |
| Location differences?                                                                                                                                                                                                                                                                                                                                                                                                                                                                                                                                                                                                                                                                                                                                                                                                                                                                                                                                                                                                                                                             | N                                    |                                                                                                                                                             |
| Policy/public health decisions?                                                                                                                                                                                                                                                                                                                                                                                                                                                                                                                                                                                                                                                                                                                                                                                                                                                                                                                                                                                                                                                   | Y                                    |                                                                                                                                                             |
| Cluster preferences?                                                                                                                                                                                                                                                                                                                                                                                                                                                                                                                                                                                                                                                                                                                                                                                                                                                                                                                                                                                                                                                              | U                                    |                                                                                                                                                             |
| Some other process? (specify)                                                                                                                                                                                                                                                                                                                                                                                                                                                                                                                                                                                                                                                                                                                                                                                                                                                                                                                                                                                                                                                     | U                                    |                                                                                                                                                             |
| <i>Which parts of the study were prospective:</i>                                                                                                                                                                                                                                                                                                                                                                                                                                                                                                                                                                                                                                                                                                                                                                                                                                                                                                                                                                                                                                 |                                      |                                                                                                                                                             |
| Identification of participating clusters?                                                                                                                                                                                                                                                                                                                                                                                                                                                                                                                                                                                                                                                                                                                                                                                                                                                                                                                                                                                                                                         | N                                    | Administrative database entirely retrospective                                                                                                              |
| Assessment of baseline and allocation to intervention?                                                                                                                                                                                                                                                                                                                                                                                                                                                                                                                                                                                                                                                                                                                                                                                                                                                                                                                                                                                                                            | N                                    |                                                                                                                                                             |
| Assessment of outcomes?                                                                                                                                                                                                                                                                                                                                                                                                                                                                                                                                                                                                                                                                                                                                                                                                                                                                                                                                                                                                                                                           | N                                    |                                                                                                                                                             |
| Generation of hypotheses?                                                                                                                                                                                                                                                                                                                                                                                                                                                                                                                                                                                                                                                                                                                                                                                                                                                                                                                                                                                                                                                         | N                                    |                                                                                                                                                             |
| <i>On what variables was comparability between groups assessed:</i>                                                                                                                                                                                                                                                                                                                                                                                                                                                                                                                                                                                                                                                                                                                                                                                                                                                                                                                                                                                                               |                                      |                                                                                                                                                             |
| Potential confounders?                                                                                                                                                                                                                                                                                                                                                                                                                                                                                                                                                                                                                                                                                                                                                                                                                                                                                                                                                                                                                                                            | N                                    | Authors did not address confounders that could influence the outcomes such as diagnosis type, city, age, availability of services, proximity to death, etc. |
| Baseline assessment of outcome variables?                                                                                                                                                                                                                                                                                                                                                                                                                                                                                                                                                                                                                                                                                                                                                                                                                                                                                                                                                                                                                                         | N                                    |                                                                                                                                                             |
| <i>Other potential sources of bias/confounding/limitations/comments</i>                                                                                                                                                                                                                                                                                                                                                                                                                                                                                                                                                                                                                                                                                                                                                                                                                                                                                                                                                                                                           |                                      |                                                                                                                                                             |
| <ul style="list-style-type: none"> <li>- The enrollment in the program depended on financial criteria to be covered by MediCal. Which included life-threatening conditions and were expanded to all conditions expected to consume more than 30 days/year of hospital admissions.</li> <li>- Not clear if all the patients enrolled in the same point in time, and if the before and after expenditures were flagged as such, independent of how long they were under the program.</li> <li>- Unbilled or unpaid claims were excluded from the data, possibly overestimating cost savings.</li> <li>- Survey used a likert scale of 4 points the author's called quality of life. No validation mentioned.</li> <li>- No control group was used to compare natural trends in shift of healthcare resources utilization.</li> <li>- The authors briefly mention certain limitations of the study and the need to use full administrative data with control, to better estimate the differences suggested by this report on the shift of healthcare resource allocation.</li> </ul> |                                      |                                                                                                                                                             |

|                                                                                                                                                                                                                                                                                                                                                                                                                                                                                                                                                                                                                                                                                                                                                                                                                                                                                                                                                      |                                         |                                                                                                                                                                        |
|------------------------------------------------------------------------------------------------------------------------------------------------------------------------------------------------------------------------------------------------------------------------------------------------------------------------------------------------------------------------------------------------------------------------------------------------------------------------------------------------------------------------------------------------------------------------------------------------------------------------------------------------------------------------------------------------------------------------------------------------------------------------------------------------------------------------------------------------------------------------------------------------------------------------------------------------------|-----------------------------------------|------------------------------------------------------------------------------------------------------------------------------------------------------------------------|
| <b>Article</b>                                                                                                                                                                                                                                                                                                                                                                                                                                                                                                                                                                                                                                                                                                                                                                                                                                                                                                                                       | <b>Pascuet E et al 2010<sup>8</sup></b> |                                                                                                                                                                        |
| <b>Allocation</b>                                                                                                                                                                                                                                                                                                                                                                                                                                                                                                                                                                                                                                                                                                                                                                                                                                                                                                                                    | Individual level                        |                                                                                                                                                                        |
| <b>Study design</b>                                                                                                                                                                                                                                                                                                                                                                                                                                                                                                                                                                                                                                                                                                                                                                                                                                                                                                                                  | ChBA                                    |                                                                                                                                                                        |
| <b>Study design features</b>                                                                                                                                                                                                                                                                                                                                                                                                                                                                                                                                                                                                                                                                                                                                                                                                                                                                                                                         | <b>Support for judgment</b>             |                                                                                                                                                                        |
| <i>Was there a comparison:</i>                                                                                                                                                                                                                                                                                                                                                                                                                                                                                                                                                                                                                                                                                                                                                                                                                                                                                                                       |                                         |                                                                                                                                                                        |
| Between two or more groups of clusters receiving different interventions?                                                                                                                                                                                                                                                                                                                                                                                                                                                                                                                                                                                                                                                                                                                                                                                                                                                                            | N                                       | Children who used the respite admission at least once, had their total hospital/hospice admissions measured before and after access to first respite                   |
| Within the same group of clusters over time?                                                                                                                                                                                                                                                                                                                                                                                                                                                                                                                                                                                                                                                                                                                                                                                                                                                                                                         | Y                                       |                                                                                                                                                                        |
| <i>Were participant/clusters allocated to groups by:</i>                                                                                                                                                                                                                                                                                                                                                                                                                                                                                                                                                                                                                                                                                                                                                                                                                                                                                             |                                         |                                                                                                                                                                        |
| Concealed randomization?                                                                                                                                                                                                                                                                                                                                                                                                                                                                                                                                                                                                                                                                                                                                                                                                                                                                                                                             | N                                       | It is not clear whether the groups were determined by the date of hospice opening or the date of first utilization of respite services from a pediatric hospice        |
| Quasi-randomization?                                                                                                                                                                                                                                                                                                                                                                                                                                                                                                                                                                                                                                                                                                                                                                                                                                                                                                                                 | N                                       |                                                                                                                                                                        |
| By other action of researchers?                                                                                                                                                                                                                                                                                                                                                                                                                                                                                                                                                                                                                                                                                                                                                                                                                                                                                                                      | N                                       |                                                                                                                                                                        |
| Time differences?                                                                                                                                                                                                                                                                                                                                                                                                                                                                                                                                                                                                                                                                                                                                                                                                                                                                                                                                    | N                                       |                                                                                                                                                                        |
| Location differences?                                                                                                                                                                                                                                                                                                                                                                                                                                                                                                                                                                                                                                                                                                                                                                                                                                                                                                                                | N                                       |                                                                                                                                                                        |
| Policy/public health decisions?                                                                                                                                                                                                                                                                                                                                                                                                                                                                                                                                                                                                                                                                                                                                                                                                                                                                                                                      | Y                                       |                                                                                                                                                                        |
| Cluster preferences?                                                                                                                                                                                                                                                                                                                                                                                                                                                                                                                                                                                                                                                                                                                                                                                                                                                                                                                                 | U                                       |                                                                                                                                                                        |
| Some other process? (specify)                                                                                                                                                                                                                                                                                                                                                                                                                                                                                                                                                                                                                                                                                                                                                                                                                                                                                                                        | U                                       |                                                                                                                                                                        |
| <i>Which parts of the study were prospective:</i>                                                                                                                                                                                                                                                                                                                                                                                                                                                                                                                                                                                                                                                                                                                                                                                                                                                                                                    |                                         |                                                                                                                                                                        |
| Identification of participating clusters?                                                                                                                                                                                                                                                                                                                                                                                                                                                                                                                                                                                                                                                                                                                                                                                                                                                                                                            | N                                       | Administrative database entirely retrospective                                                                                                                         |
| Assessment of baseline and allocation to intervention?                                                                                                                                                                                                                                                                                                                                                                                                                                                                                                                                                                                                                                                                                                                                                                                                                                                                                               | N                                       |                                                                                                                                                                        |
| Assessment of outcomes?                                                                                                                                                                                                                                                                                                                                                                                                                                                                                                                                                                                                                                                                                                                                                                                                                                                                                                                              | N                                       |                                                                                                                                                                        |
| Generation of hypotheses?                                                                                                                                                                                                                                                                                                                                                                                                                                                                                                                                                                                                                                                                                                                                                                                                                                                                                                                            | N                                       |                                                                                                                                                                        |
| <i>On what variables was comparability between groups assessed:</i>                                                                                                                                                                                                                                                                                                                                                                                                                                                                                                                                                                                                                                                                                                                                                                                                                                                                                  |                                         |                                                                                                                                                                        |
| Potential confounders?                                                                                                                                                                                                                                                                                                                                                                                                                                                                                                                                                                                                                                                                                                                                                                                                                                                                                                                               | N                                       | Authors did not address confounders that could influence outcomes such as different types of inpatient utilization, diseases categories, age or proximity to services. |
| Baseline assessment of outcome variables?                                                                                                                                                                                                                                                                                                                                                                                                                                                                                                                                                                                                                                                                                                                                                                                                                                                                                                            | N                                       |                                                                                                                                                                        |
| <i>Other potential sources of bias/confounding/limitations/comments</i>                                                                                                                                                                                                                                                                                                                                                                                                                                                                                                                                                                                                                                                                                                                                                                                                                                                                              |                                         |                                                                                                                                                                        |
| <ul style="list-style-type: none"> <li>- The authors stated that the cost for inpatient admissions at the hospital had a fixed cost per day (based on 2007 cost), based on the interprovincial billing rate (including direct healthcare cost and overhead costs). Costs were not differentiated per type of admission - general, critical care.</li> <li>- Not clear if costs included emergency and outpatient visits, and how their costs were addressed.</li> <li>- Cost for hospice care was calculated by average cost per day, being the annual hospice budget divided by number of beds per year. It seems that hospice only provided respite care.</li> <li>- Not clear if all patients included had 24 months of observation period. Not clear, in case of shorter period, if the outcomes were weighted by time in the study.</li> <li>- The authors recognize the limitations of different cost analyses across institutions.</li> </ul> |                                         |                                                                                                                                                                        |



|                                                                                                                                                                                                                                                                                                                                                                                                 |                                       |                                                                   |
|-------------------------------------------------------------------------------------------------------------------------------------------------------------------------------------------------------------------------------------------------------------------------------------------------------------------------------------------------------------------------------------------------|---------------------------------------|-------------------------------------------------------------------|
| <b>Article</b>                                                                                                                                                                                                                                                                                                                                                                                  | <b>Smith A et al 2013<sup>9</sup></b> |                                                                   |
| <b>Allocation</b>                                                                                                                                                                                                                                                                                                                                                                               | Individual level                      |                                                                   |
| <b>Study design</b>                                                                                                                                                                                                                                                                                                                                                                             | ChBA/RCS                              |                                                                   |
| <b>Study design features</b>                                                                                                                                                                                                                                                                                                                                                                    | <b>Support for judgment</b>           |                                                                   |
| <i>Was there a comparison:</i>                                                                                                                                                                                                                                                                                                                                                                  |                                       |                                                                   |
| Between two or more groups of clusters receiving different interventions?                                                                                                                                                                                                                                                                                                                       | N                                     | Children discharged from a single tertiary care provider          |
| Within the same group of clusters over time?                                                                                                                                                                                                                                                                                                                                                    | Y                                     |                                                                   |
| <i>Were participant/clusters allocated to groups by:</i>                                                                                                                                                                                                                                                                                                                                        |                                       |                                                                   |
| Concealed randomization?                                                                                                                                                                                                                                                                                                                                                                        | N                                     | Authors classified groups based on utilization of PC consultation |
| Quasi-randomization?                                                                                                                                                                                                                                                                                                                                                                            | N                                     |                                                                   |
| By other action of researchers?                                                                                                                                                                                                                                                                                                                                                                 | N                                     |                                                                   |
| Time differences?                                                                                                                                                                                                                                                                                                                                                                               | Y                                     |                                                                   |
| Location differences?                                                                                                                                                                                                                                                                                                                                                                           | N                                     |                                                                   |
| Policy/public health decisions?                                                                                                                                                                                                                                                                                                                                                                 | Y                                     |                                                                   |
| Cluster preferences?                                                                                                                                                                                                                                                                                                                                                                            | na                                    |                                                                   |
| Some other process? (specify)                                                                                                                                                                                                                                                                                                                                                                   | na                                    |                                                                   |
| <i>Which parts of the study were prospective:</i>                                                                                                                                                                                                                                                                                                                                               |                                       |                                                                   |
| Identification of participating clusters?                                                                                                                                                                                                                                                                                                                                                       | na                                    | Abstract does not bring enough information on the methods         |
| Assessment of baseline and allocation to intervention?                                                                                                                                                                                                                                                                                                                                          | na                                    |                                                                   |
| Assessment of outcomes?                                                                                                                                                                                                                                                                                                                                                                         | na                                    |                                                                   |
| Generation of hypotheses?                                                                                                                                                                                                                                                                                                                                                                       | na                                    |                                                                   |
| <i>On what variables was comparability between groups assessed:</i>                                                                                                                                                                                                                                                                                                                             |                                       |                                                                   |
| Potential confounders?                                                                                                                                                                                                                                                                                                                                                                          | N                                     | Authors did not control for any confounders                       |
| Baseline assessment of outcome variables?                                                                                                                                                                                                                                                                                                                                                       | N                                     |                                                                   |
| <i>Other potential sources of bias/confounding/limitations/comments</i>                                                                                                                                                                                                                                                                                                                         |                                       |                                                                   |
| <p>- Abstract presented at a conference. It does not bring enough information about the methods applied in this research. We are unable to evaluate risk of bias, selection and identification of participants, intervention definition.</p> <p>- The authors did not control for differences in the population found in the research such as gender, comorbidities, technology dependence.</p> |                                       |                                                                   |

|                                                                                                                                                                                                                                                                                                                                                                                                                                                                                                                                                                                                                                                                                                                                                                                                                                                                                                                                                                                                                                          |                                         |                                                                                                                                                                |
|------------------------------------------------------------------------------------------------------------------------------------------------------------------------------------------------------------------------------------------------------------------------------------------------------------------------------------------------------------------------------------------------------------------------------------------------------------------------------------------------------------------------------------------------------------------------------------------------------------------------------------------------------------------------------------------------------------------------------------------------------------------------------------------------------------------------------------------------------------------------------------------------------------------------------------------------------------------------------------------------------------------------------------------|-----------------------------------------|----------------------------------------------------------------------------------------------------------------------------------------------------------------|
| <b>Article</b>                                                                                                                                                                                                                                                                                                                                                                                                                                                                                                                                                                                                                                                                                                                                                                                                                                                                                                                                                                                                                           | <b>Ward-Smith P et al <sup>10</sup></b> |                                                                                                                                                                |
| <b>Allocation</b>                                                                                                                                                                                                                                                                                                                                                                                                                                                                                                                                                                                                                                                                                                                                                                                                                                                                                                                                                                                                                        | Group Level                             |                                                                                                                                                                |
| <b>Study design</b>                                                                                                                                                                                                                                                                                                                                                                                                                                                                                                                                                                                                                                                                                                                                                                                                                                                                                                                                                                                                                      | CC                                      |                                                                                                                                                                |
| <b>Study design features</b>                                                                                                                                                                                                                                                                                                                                                                                                                                                                                                                                                                                                                                                                                                                                                                                                                                                                                                                                                                                                             | <b>Support for judgment</b>             |                                                                                                                                                                |
| <i>Was there a comparison:</i>                                                                                                                                                                                                                                                                                                                                                                                                                                                                                                                                                                                                                                                                                                                                                                                                                                                                                                                                                                                                           |                                         |                                                                                                                                                                |
| Between two or more groups of clusters receiving different interventions?                                                                                                                                                                                                                                                                                                                                                                                                                                                                                                                                                                                                                                                                                                                                                                                                                                                                                                                                                                | Y                                       | Cases and controls from 1 hospital who carried the PPCP                                                                                                        |
| Within the same group of clusters over time?                                                                                                                                                                                                                                                                                                                                                                                                                                                                                                                                                                                                                                                                                                                                                                                                                                                                                                                                                                                             | Y                                       |                                                                                                                                                                |
| <i>Were participant/clusters allocated to groups by:</i>                                                                                                                                                                                                                                                                                                                                                                                                                                                                                                                                                                                                                                                                                                                                                                                                                                                                                                                                                                                 |                                         |                                                                                                                                                                |
| Concealed randomization?                                                                                                                                                                                                                                                                                                                                                                                                                                                                                                                                                                                                                                                                                                                                                                                                                                                                                                                                                                                                                 | N                                       | Cases and controls were not chosen randomly, and were rather chosen to provide a range of diagnoses and enrollment in the PPCP within 6 months prior to death. |
| Quasi-randomization?                                                                                                                                                                                                                                                                                                                                                                                                                                                                                                                                                                                                                                                                                                                                                                                                                                                                                                                                                                                                                     | N                                       |                                                                                                                                                                |
| By other action of researchers?                                                                                                                                                                                                                                                                                                                                                                                                                                                                                                                                                                                                                                                                                                                                                                                                                                                                                                                                                                                                          | Y                                       |                                                                                                                                                                |
| Time differences?                                                                                                                                                                                                                                                                                                                                                                                                                                                                                                                                                                                                                                                                                                                                                                                                                                                                                                                                                                                                                        | U                                       |                                                                                                                                                                |
| Location differences?                                                                                                                                                                                                                                                                                                                                                                                                                                                                                                                                                                                                                                                                                                                                                                                                                                                                                                                                                                                                                    | N                                       |                                                                                                                                                                |
| Policy/public health decisions?                                                                                                                                                                                                                                                                                                                                                                                                                                                                                                                                                                                                                                                                                                                                                                                                                                                                                                                                                                                                          | N                                       |                                                                                                                                                                |
| Cluster preferences?                                                                                                                                                                                                                                                                                                                                                                                                                                                                                                                                                                                                                                                                                                                                                                                                                                                                                                                                                                                                                     | U                                       |                                                                                                                                                                |
| Some other process? (specify)                                                                                                                                                                                                                                                                                                                                                                                                                                                                                                                                                                                                                                                                                                                                                                                                                                                                                                                                                                                                            | U                                       |                                                                                                                                                                |
| <i>Which parts of the study were prospective:</i>                                                                                                                                                                                                                                                                                                                                                                                                                                                                                                                                                                                                                                                                                                                                                                                                                                                                                                                                                                                        |                                         |                                                                                                                                                                |
| Identification of participating clusters?                                                                                                                                                                                                                                                                                                                                                                                                                                                                                                                                                                                                                                                                                                                                                                                                                                                                                                                                                                                                | N                                       | Administrative database entirely retrospective                                                                                                                 |
| Assessment of baseline and allocation to intervention?                                                                                                                                                                                                                                                                                                                                                                                                                                                                                                                                                                                                                                                                                                                                                                                                                                                                                                                                                                                   | N                                       |                                                                                                                                                                |
| Assessment of outcomes?                                                                                                                                                                                                                                                                                                                                                                                                                                                                                                                                                                                                                                                                                                                                                                                                                                                                                                                                                                                                                  | N                                       |                                                                                                                                                                |
| Generation of hypotheses?                                                                                                                                                                                                                                                                                                                                                                                                                                                                                                                                                                                                                                                                                                                                                                                                                                                                                                                                                                                                                | N                                       |                                                                                                                                                                |
| <i>On what variables was comparability between groups assessed:</i>                                                                                                                                                                                                                                                                                                                                                                                                                                                                                                                                                                                                                                                                                                                                                                                                                                                                                                                                                                      |                                         |                                                                                                                                                                |
| Potential confounders?                                                                                                                                                                                                                                                                                                                                                                                                                                                                                                                                                                                                                                                                                                                                                                                                                                                                                                                                                                                                                   | N                                       | None                                                                                                                                                           |
| Baseline assessment of outcome variables?                                                                                                                                                                                                                                                                                                                                                                                                                                                                                                                                                                                                                                                                                                                                                                                                                                                                                                                                                                                                | N                                       |                                                                                                                                                                |
| <i>Other potential sources of bias/confounding/limitations/comments</i>                                                                                                                                                                                                                                                                                                                                                                                                                                                                                                                                                                                                                                                                                                                                                                                                                                                                                                                                                                  |                                         |                                                                                                                                                                |
| <ul style="list-style-type: none"> <li>- Although the authors named the study as case-control, it is technically a cohort comparison, where the cohorts were distinct by the intervention – received services from the pediatric palliative care program.</li> <li>- Among the 133 possible cases identified under the inclusion criteria, the authors chose 9. This choice was not random but made by the authors to provide a range of diagnostics and because they had being enrolled in the PPCP within 6 months before death.</li> <li>- Do not state the matching criteria and if it was randomly selected or, as the cases, chosen by nurses.</li> <li>- Not clear if the controls were contemporary to the cases or if they were selected from the period before the implementation of the program.</li> <li>- Controls were slightly different in gender, and race.</li> <li>- It does not specify if the cost was adjusted to reflect the inflation, or if they incurred in the same period for cases and controls.</li> </ul> |                                         |                                                                                                                                                                |

|                                                                                                                                                                                                                                                                                                                                                                                                                                                                                                                                                                                                                                                                                                                                                                                                                                                                                                                                       |                                |                                                                                                                                                                                                                                                                                       |
|---------------------------------------------------------------------------------------------------------------------------------------------------------------------------------------------------------------------------------------------------------------------------------------------------------------------------------------------------------------------------------------------------------------------------------------------------------------------------------------------------------------------------------------------------------------------------------------------------------------------------------------------------------------------------------------------------------------------------------------------------------------------------------------------------------------------------------------------------------------------------------------------------------------------------------------|--------------------------------|---------------------------------------------------------------------------------------------------------------------------------------------------------------------------------------------------------------------------------------------------------------------------------------|
| <b>Article</b>                                                                                                                                                                                                                                                                                                                                                                                                                                                                                                                                                                                                                                                                                                                                                                                                                                                                                                                        | Belasco JB et al <sup>11</sup> |                                                                                                                                                                                                                                                                                       |
| <b>Allocation</b>                                                                                                                                                                                                                                                                                                                                                                                                                                                                                                                                                                                                                                                                                                                                                                                                                                                                                                                     |                                |                                                                                                                                                                                                                                                                                       |
| <b>Study design</b>                                                                                                                                                                                                                                                                                                                                                                                                                                                                                                                                                                                                                                                                                                                                                                                                                                                                                                                   | CR/CS                          |                                                                                                                                                                                                                                                                                       |
| <b>Study design features</b>                                                                                                                                                                                                                                                                                                                                                                                                                                                                                                                                                                                                                                                                                                                                                                                                                                                                                                          | <b>Support for judgment</b>    |                                                                                                                                                                                                                                                                                       |
| <i>Was there a comparison:</i>                                                                                                                                                                                                                                                                                                                                                                                                                                                                                                                                                                                                                                                                                                                                                                                                                                                                                                        |                                |                                                                                                                                                                                                                                                                                       |
| Between two or more groups of clusters receiving different interventions?                                                                                                                                                                                                                                                                                                                                                                                                                                                                                                                                                                                                                                                                                                                                                                                                                                                             | na                             | Case series with 3 patients                                                                                                                                                                                                                                                           |
| Within the same group of clusters over time?                                                                                                                                                                                                                                                                                                                                                                                                                                                                                                                                                                                                                                                                                                                                                                                                                                                                                          | na                             |                                                                                                                                                                                                                                                                                       |
| <i>Were participant/clusters allocated to groups by:</i>                                                                                                                                                                                                                                                                                                                                                                                                                                                                                                                                                                                                                                                                                                                                                                                                                                                                              |                                |                                                                                                                                                                                                                                                                                       |
| Concealed randomization?                                                                                                                                                                                                                                                                                                                                                                                                                                                                                                                                                                                                                                                                                                                                                                                                                                                                                                              | N                              | Out of the 154 patients enrolled in the PPCP during the study period, some were selected by the author to reflect medically complicated patients, whose level of care at home was comparable to being in hospital, and differed only in palliative intent rather than intent to cure. |
| Quasi-randomization?                                                                                                                                                                                                                                                                                                                                                                                                                                                                                                                                                                                                                                                                                                                                                                                                                                                                                                                  | N                              |                                                                                                                                                                                                                                                                                       |
| By other action of researchers?                                                                                                                                                                                                                                                                                                                                                                                                                                                                                                                                                                                                                                                                                                                                                                                                                                                                                                       | Y                              |                                                                                                                                                                                                                                                                                       |
| Time differences?                                                                                                                                                                                                                                                                                                                                                                                                                                                                                                                                                                                                                                                                                                                                                                                                                                                                                                                     | N                              |                                                                                                                                                                                                                                                                                       |
| Location differences?                                                                                                                                                                                                                                                                                                                                                                                                                                                                                                                                                                                                                                                                                                                                                                                                                                                                                                                 | N                              |                                                                                                                                                                                                                                                                                       |
| Policy/public health decisions?                                                                                                                                                                                                                                                                                                                                                                                                                                                                                                                                                                                                                                                                                                                                                                                                                                                                                                       | N                              |                                                                                                                                                                                                                                                                                       |
| Cluster preferences?                                                                                                                                                                                                                                                                                                                                                                                                                                                                                                                                                                                                                                                                                                                                                                                                                                                                                                                  | U                              |                                                                                                                                                                                                                                                                                       |
| Some other process? (specify)                                                                                                                                                                                                                                                                                                                                                                                                                                                                                                                                                                                                                                                                                                                                                                                                                                                                                                         | U                              |                                                                                                                                                                                                                                                                                       |
| <i>Which parts of the study were prospective:</i>                                                                                                                                                                                                                                                                                                                                                                                                                                                                                                                                                                                                                                                                                                                                                                                                                                                                                     |                                |                                                                                                                                                                                                                                                                                       |
| Identification of participating clusters?                                                                                                                                                                                                                                                                                                                                                                                                                                                                                                                                                                                                                                                                                                                                                                                                                                                                                             | N                              | Administrative database entirely retrospective                                                                                                                                                                                                                                        |
| Assessment of baseline and allocation to intervention?                                                                                                                                                                                                                                                                                                                                                                                                                                                                                                                                                                                                                                                                                                                                                                                                                                                                                | N                              |                                                                                                                                                                                                                                                                                       |
| Assessment of outcomes?                                                                                                                                                                                                                                                                                                                                                                                                                                                                                                                                                                                                                                                                                                                                                                                                                                                                                                               | N                              |                                                                                                                                                                                                                                                                                       |
| Generation of hypotheses?                                                                                                                                                                                                                                                                                                                                                                                                                                                                                                                                                                                                                                                                                                                                                                                                                                                                                                             | N                              |                                                                                                                                                                                                                                                                                       |
| <i>On what variables was comparability between groups assessed:</i>                                                                                                                                                                                                                                                                                                                                                                                                                                                                                                                                                                                                                                                                                                                                                                                                                                                                   |                                |                                                                                                                                                                                                                                                                                       |
| Potential confounders?                                                                                                                                                                                                                                                                                                                                                                                                                                                                                                                                                                                                                                                                                                                                                                                                                                                                                                                | na                             | None                                                                                                                                                                                                                                                                                  |
| Baseline assessment of outcome variables?                                                                                                                                                                                                                                                                                                                                                                                                                                                                                                                                                                                                                                                                                                                                                                                                                                                                                             | na                             |                                                                                                                                                                                                                                                                                       |
| <i>Other potential sources of bias/confounding/limitations/comments</i>                                                                                                                                                                                                                                                                                                                                                                                                                                                                                                                                                                                                                                                                                                                                                                                                                                                               |                                |                                                                                                                                                                                                                                                                                       |
| <p>- Did not state how the patients were selected.</p> <p>- Did not describe how the number and types of procedures for charges comparison were measured and the comparison was created. It's not clear if the type of procedures were compared to a control, or if it was estimated to adapt to the home care model for the same patient, or if it was measured from the same patient in both settings.</p> <p>- The authors stated that for home care, because the way the insurances operate locally, charges per day did not included physicians home visit, social worker, coordinator of care, skilled nurse visits longer than 2 hours. Also, visits and procedures not authorized by insurance were not included, which may represent part of the out-of-pocket expenses for families, and not reflected in this comparison.</p> <p>- Charges do not appropriately reflect costs, introducing important measurement bias.</p> |                                |                                                                                                                                                                                                                                                                                       |

## References

1. Fraser LK, van Laar M, Miller M, et al. Does referral to specialist paediatric palliative care services reduce hospital admissions in oncology patients at the end of life? *Br J Cancer* 2013;108:1273-9.
2. Keele L, Keenan HT, Sheetz J, et al. Differences in characteristics of dying children who receive and do not receive palliative care. *Pediatrics* 2013;132:72-8.
3. Dussel V, Kreicbergs U, Hilden JM, et al. Looking beyond where children die: determinants and effects of planning a child's location of death. *J Pain Symptom Manage* 2009;37:33-43.

4. Knapp CA, Shenkman E, Marcu M, et al. Pediatric palliative care: describing hospice users and identifying factors that affect hospice expenditures. *J Palliat Med* 2009;12:223-9.
5. Arland LC, Hendricks-Ferguson VL, Pearson J, et al. Development of an in-home standardized end-of-life treatment program for pediatric patients dying of brain tumors. *J Spec Pediatr Nurs* 2013;18:144-57.
6. Postier A, Chrastek J, Nugent S, et al. Exposure to home-based pediatric palliative and hospice care and its impact on hospital and emergency care charges at a single institution. *J Palliat Med* 2014;17:183-8.
7. Gans D, Kominski GF, Roby DH, et al. *Better outcomes, lower costs: palliative care program reduces stress, costs of care for children with life-threatening conditions*. Los Angeles: UCLA Center for Health Policy Research; 2012.
8. Pascuet E, Cowin L, Vaillancourt R, et al. A comparative cost-minimization analysis of providing paediatric palliative respite care before and after the opening of services at a paediatric hospice. *Health Manage Forum* 2010;23:63-6.
9. Smith A, Andrews S, Maloney C, et al. Pediatric palliative care in high cost patients. In: Poss WB, editor. *Pediatric critical care medicine. Conference: American Academy of Pediatrics, Section on Critical Care National Conference and Exhibition*. Vol 26. Orlando (FL): Lippincott Williams and Wilkins; 2013. Available: <https://aap.confex.com/aap/2013/webprogram/Paper21649.html> (accessed 2015 Jan. 8).
10. Ward-Smith P, Korphage RM, Hutto C. Where health care dollars are spent when pediatric palliative care is provided. *Nurs Econ* 2008;26:175-8.
11. Belasco JB, Danz P, Drill A, et al. Supportive care: palliative care in children, adolescents, and young adults-model of care, interventions, and cost of care: a retrospective review. *J Palliat Care* 2000;16:39-46.
